# Supplementary material for: Case Report: Stepwise Anti-Inflammatory and Anti-SARS-CoV-2 Effects Following Convalescent Plasma Therapy With Full Clinical Recovery
Source: PubMed Central journal article supplement (PMC8097002; doi:10.3389/fimmu.2021.613502), 2021-04-21
Supplement: DataSheet_2.pdf [file DataSheet_2.pdf]

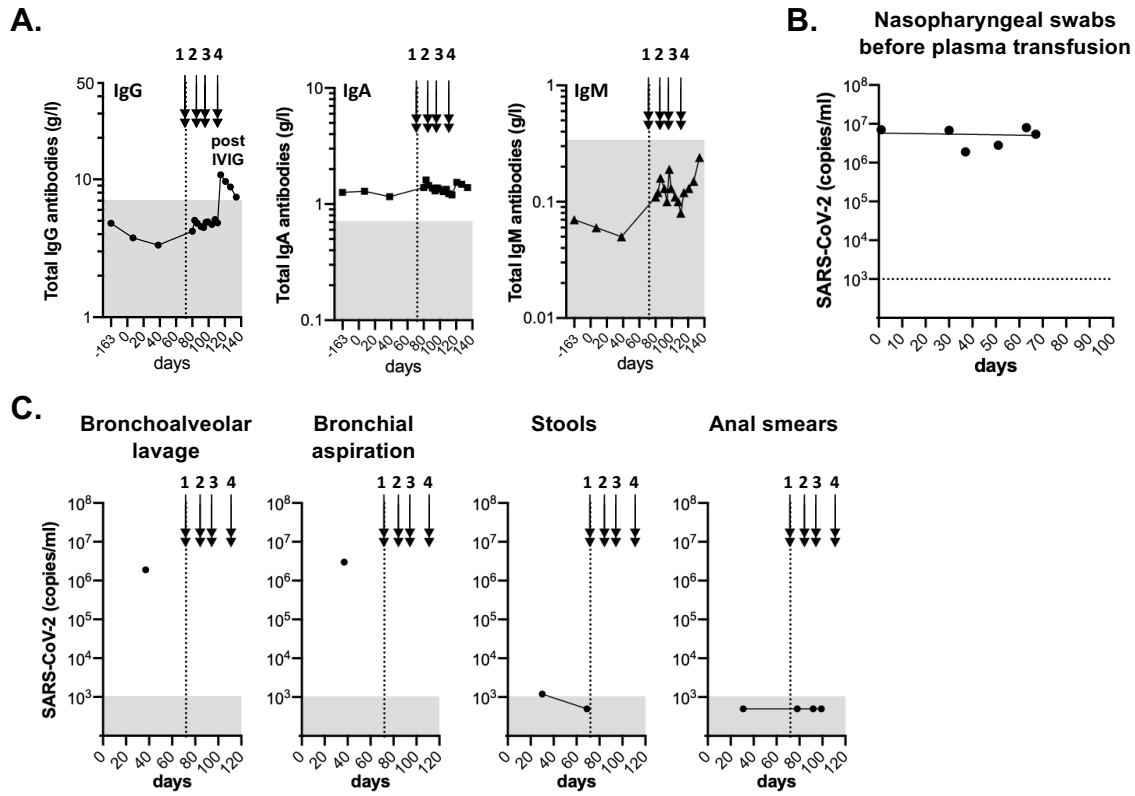

Supplemental Figure 1, Zimmerli et al.

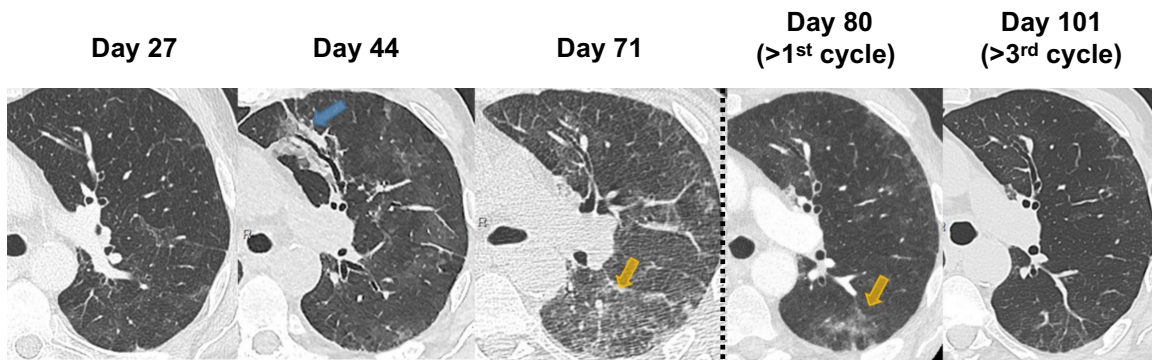

Supplemental Figure 2, Zimmerli et al.

**A.**

| Date  | Day | Cycles of plasma transfusion |                  |          | EUROimmun/ELISA  |                  | Total IgG within plasma |                       |
|-------|-----|------------------------------|------------------|----------|------------------|------------------|-------------------------|-----------------------|
|       |     | Cycles                       | Transfused unit  | Volume   | anti-S1 IgG S/CO | anti-S1 IgA S/CO | g/l                     | g/unit of transfusion |
| 11.06 | 72  | Cycle 1                      | Donor 1 - unit 1 | 1x200 ml | 4.43             | 1.62             | 10.3                    | 2.06                  |
| 12.06 | 73  | Cycle 1                      | Donor 1 - unit 2 | 1x200 ml |                  |                  |                         | 2.06                  |
| 23.06 | 84  | Cycle 2                      | Donor 1 - unit 3 | 1x200 ml |                  |                  |                         | 2.06                  |
| 24.06 | 85  | Cycle 2                      | Donor 2 - unit 1 | 1x200 ml | 5.29             | 2.95             | 8.23                    | 1.65                  |
| 3.07  | 94  | Cycle 3                      | Donor 2 - unit 2 | 1x200 ml |                  |                  |                         | 1.65                  |
| 4.07  | 95  | Cycle 3                      | Donor 2 - unit 3 | 1x200 ml |                  |                  |                         | 1.65                  |
| 20.07 | 111 | Cycle 4                      | Donor 3 - unit 1 | 1x200 ml | 7.67             | n.a.             | 6.6                     | 1.32                  |
| 21.07 | 112 | Cycle 4                      | Donor 3 - unit 2 | 1x200 ml |                  |                  |                         | 1.32                  |

**B.**

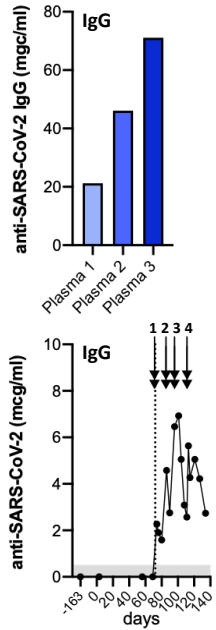

**C.**

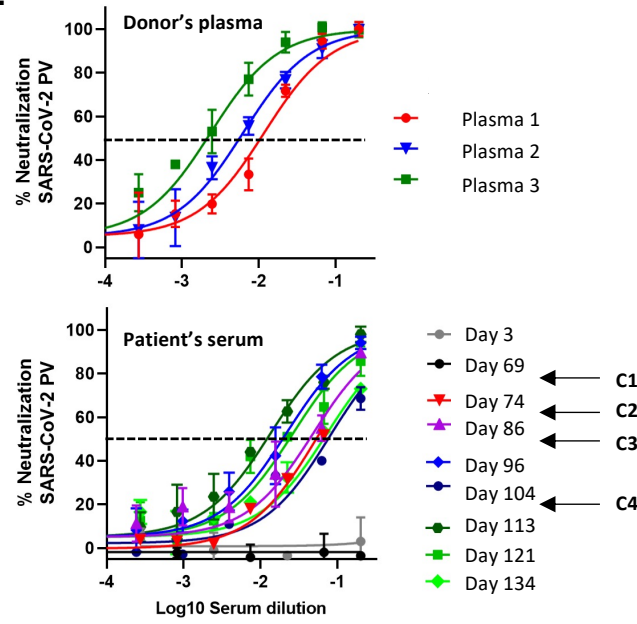

**D.**

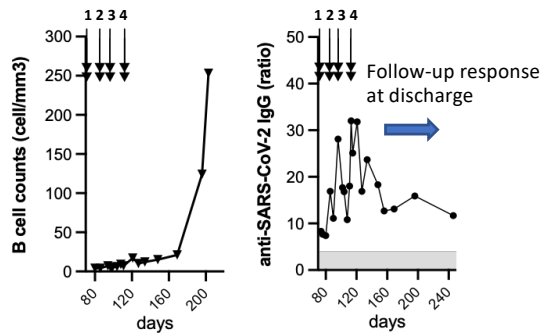

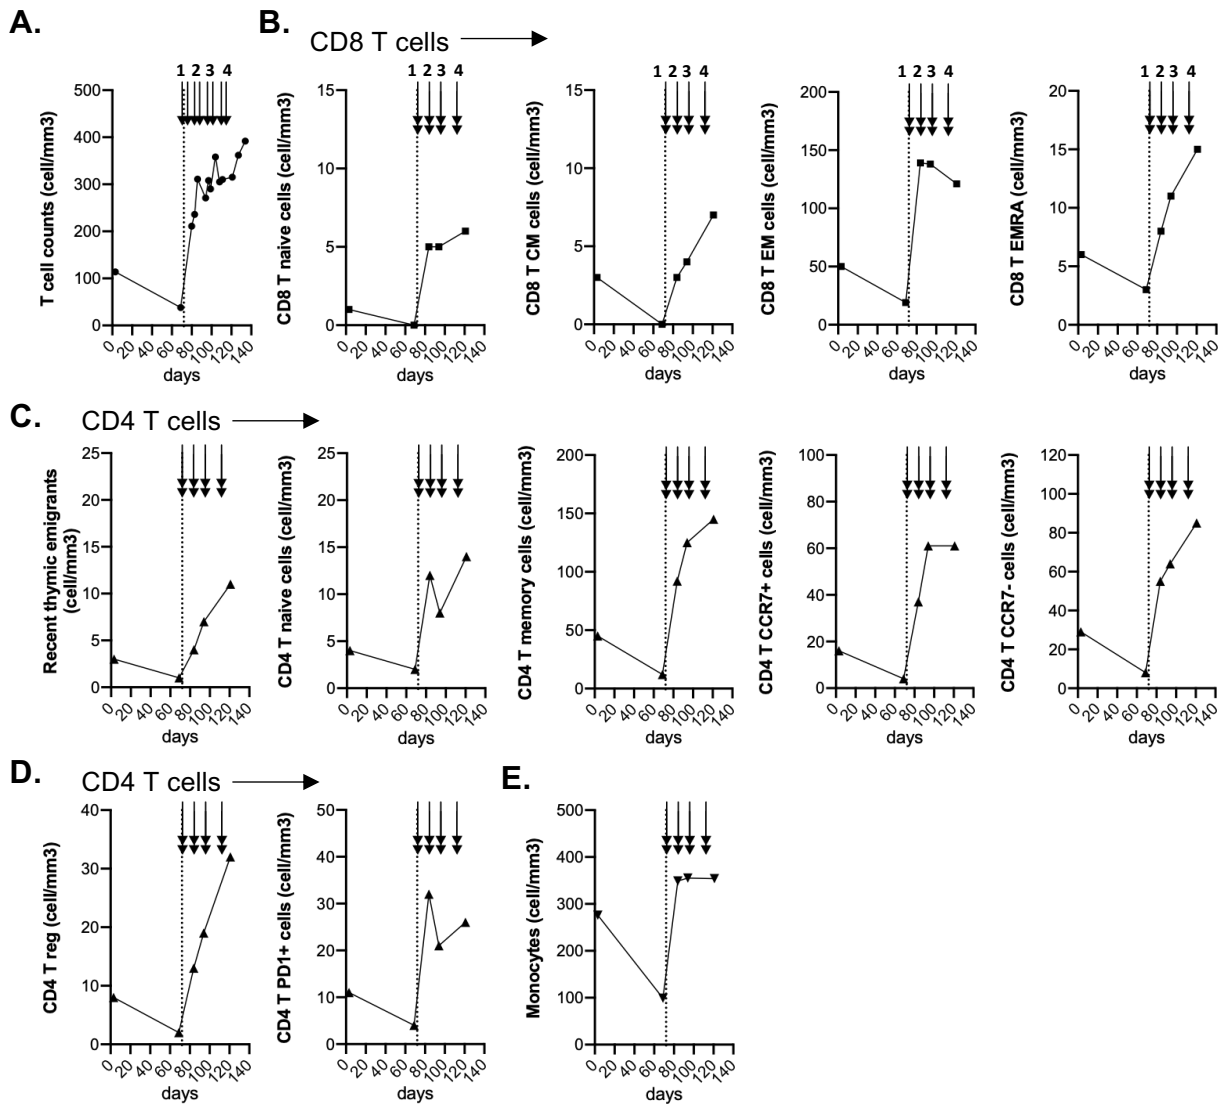

**F.**

| Day 121<br>30.07.2020 | Naive<br>B cells | Unswitched<br>memory<br>B cells | Switched<br>memory<br>B cells | Late<br>memory<br>B cells |
|-----------------------|------------------|---------------------------------|-------------------------------|---------------------------|
| cell/mm <sup>3</sup>  | CD27-IgD+<br>2   | CD27+IgD+<br>14                 | CD27+IgD-<br>1                | CD27-IgD-<br>0            |
| %                     | 12.7             | 80.5                            | 4.8                           | 0                         |

  

| Day 203<br>20.10.2020 | Naive<br>B cells | Unswitched<br>memory<br>B cells | Switched<br>memory<br>B cells | Late<br>memory<br>B cells |
|-----------------------|------------------|---------------------------------|-------------------------------|---------------------------|
| cell/mm <sup>3</sup>  | CD27-IgD+<br>157 | CD27+IgD+<br>3                  | CD27+IgD-<br>1                | CD27-IgD-<br>49           |
| %                     | 61.8             | 1.3                             | 17.6                          | 19.3                      |
